# Supplementary material
Source: PubMed Central journal article supplement (PMC11312063)
Supplement: 7804185020_S1.pdf [file 7804185020_S1.pdf]

# Parent Report\_Day 3

This form is designed to collect information about your child's positioning at home. In this form, 'You' refers to the caregiver of the child.

1) Participant ID \_\_\_\_\_

2) Today's date \_\_\_\_\_

3) Day of Data Collection

1st Day

2nd Day

3rd Day

**HOW MANY MINUTES DID YOUR CHILD SPEND IN THE FOLLOWING POSITIONS WHILE BEING RECORDED ON THE CAMERA IN YOUR HOUSE? SEE PICTURES FOR REFERENCE**

On their Back

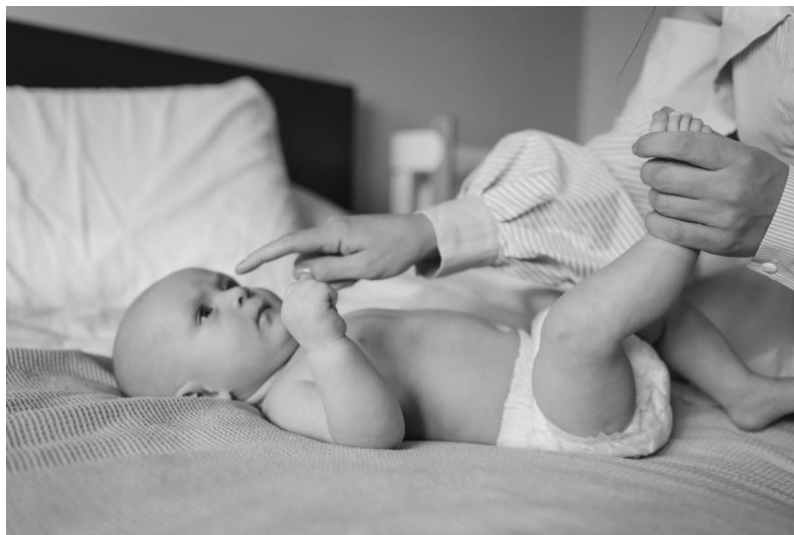

4) Add Minutes your child spent on their back here \_\_\_\_\_

(Type 999 if you do not remember)

From Inamdar, K., Dusing, S. C., Thacker, L., Pidcoe, P. E., Finucane, S., & Chu, V. (2024). Tummy time tracking: Examining agreement between parent recall and direct observation in infants. *American Journal of Occupational Therapy*, 78, 7804185020. <https://doi.org/10.5014/ajot.2024.050521>





Being held or carried

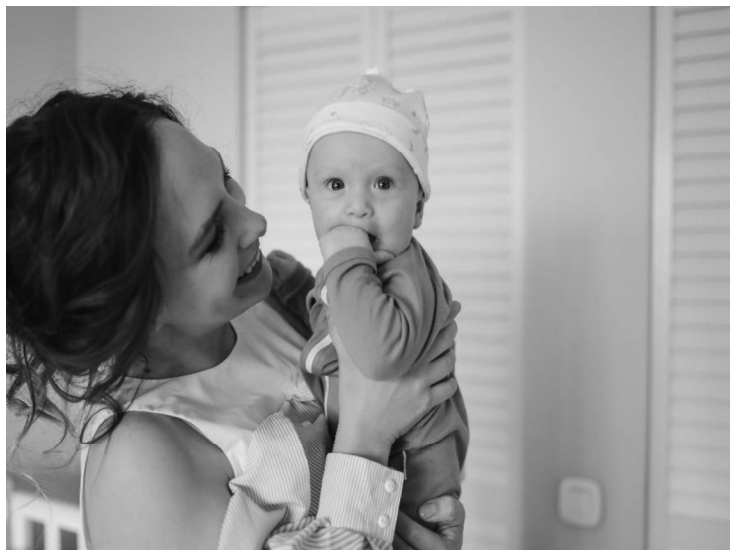

9) Add Minutes your child spent being carried or held here

\_\_\_\_\_ (Type 999 if you do not remember)

---

In a seating device (can include a high chair, stroller, car seat, reclined seat, or bouncer seat, bumbo-style seat, or a regular chair). It does not include sitting on lap or floor (refer to the previous question for that)

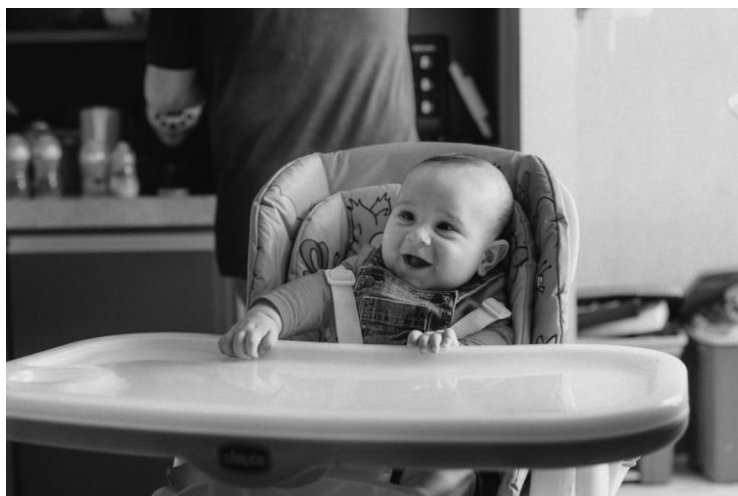

10) Add Minutes your child spent in seating device here

\_\_\_\_\_ (Type 999 if you do not remember)

From Inamdar, K., Dusing, S. C., Thacker, L., Pidcoe, P. E., Finucane, S., & Chu, V. (2024). Tummy time tracking: Examining agreement between parent recall and direct observation in infants. *American Journal of Occupational Therapy*, 78, 7804185020. <https://doi.org/10.5014/ajot.2024.050521>

### 3-DAY TUMMY TIME MINUTES RECALL

How many hours or minutes of daily tummy time did your baby perform in the past 3 days while being recorded on the camera in your house?

---

(This question only refers to the average tummy time performed while being recorded. Do not include any 'not on camera' tummy time minutes here)

From Inamdar, K., Dusing, S. C., Thacker, L., Pidcoe, P. E., Finucane, S., & Chu, V. (2024). Tummy time tracking: Examining agreement between parent recall and direct observation in infants. *American Journal of Occupational Therapy*, 78, 7804185020. <https://doi.org/10.5014/ajot.2024.050521>
